# Supplementary material
Source: publisher site journal article supplement (https://www.dovepress.com/article/386456)
Supplement: Supplementary file 1 [file get_supplementary_file.php]

Supplementary table 1. Interview guide

| **Questions** |
| --- |
| 1. General assessment of prototype 2. What was your first impression of the app? 3. What do you like/dislike about the layout, format, and volume of information? Explain why? 4. What was your experience with these features?    - 1. Activity Logging      2. Medication Plan      3. Report      4. Patient Diary      5. Appointment Management      6. Goals Setting      7. Notifications      8. Gamification      9. Educational Materials |
| 1. Perceived usability of the app 2. Was the app easy to navigate? Why? 3. Was the presentation of information in the app clear? Why? 4. Were there things that you feel are not relevant to your daily usage? |
| 1. Perceived benefits of the app 2. Which features of the app do you find useful in managing your diabetes condition? Why? 3. Would you recommend the app to others? If yes, to whom and why? |
| 1. Attitudes towards using the app 2. What are the advantages and disadvantages of using this app in managing your diabetes condition? |
| 1. Intention to use the app 2. Do you foresee yourself using the app in managing your diabetes condition? 3. Would you use this app to communicate with healthcare professionals? Why? |

Supplementary table 2. Summary of participant characteristics

| **Patient characteristics** | **Total sample (N=9) n (%)** |
| --- | --- |
| **Age**  40-50 years old  50-60 years old  60-70 years old | 2 (22)  2 (22)  5 (56) |
| **Gender**  Female | 6 (67) |
| **Ethnicity**  Chinese  Indian | 7 (78)  2 (22) |
| **Marital Status**  Single  Married  Widowed | 1 (11)  7 (78)  1 (11) |
| **Education Level**  Primary or Lower  Secondary  Post-secondary | 1 (11)  2 (22)  6 (66) |
| **Employment Status**  Part-time  Retired  Full-time | 1 (11)  3 (33)  5 (56) |

Supplementary table 3. Key themes and definitions

| **Themes** | **Definitions** |
| --- | --- |
| Simplicity | Perceptions and experiences regarding how easy or complicated it is to understand, navigate, and use the EMPOWER app. |
| Motivation | Willingness to self-manage T2DM using EMPOWER app and facilitators to encourage self-management using EMPOWER app |
| Competency | Participants’ familiarity and comfort with using a mobile application based on their technology literacy. |
| Flexibility and Adaptive | Ability of EMPOWER app to suit the needs of every user. |
| Data Sharing | Communication and transfer of information through EMPOWER app on their healthcare with their doctors and caregivers. |
| Informational Content | Perceptions of EMPOWER app in increasing knowledge and awareness of T2DM. |
| Tracking and Monitoring | Includes the features of the app, specifically activity logging, patient diary and report function that provided participants’ ways to monitor and manage their condition. |

Supplementary table 4. Quotes and themes of each section

| **Headings** | **Quotes** | **Summary** | **Round** | **Theme** |
| --- | --- | --- | --- | --- |
| Blood Glucose Logging | “Means integration with my blood glucose meter. So instead of manually inputting in my reading, I want it to be transfer across by Bluetooth.” (Male, 62-year-old) | Glucometer-connected app was desired | 1 | Simplicity & Flexibility and Adaptive |
| “Millimole per litre and milligram per deciliter. It’s two standards. Normally, U. S and Europe are using mg, Singapore uh, using millimole, but there’s some people they use milligram la. Because the meter itself might not support both la.” (Male, 62-year-old) | Selection of both blood glucose units was desired | 1 | Flexibility and Adaptive |
| “Actually, back to my first question is, is so call something that we have to do daily counting. Like, for example, when I go on to do these blood glucose monitoring, I just recorded a blood glucose reading in it and says that I have to miss a blood glucose record for the morning and afternoon. But because maybe some of us we do not do blood glucose every day or three times daily, so I don't know but sometimes it's like I feel that I'm I have eat a lot for lunch. So, I want to check now.” (Female, 41-year-old) | Backdating was desired | 1 | Flexibility and Adaptive |
| “Okay, okay. So that means, and okay, what about timing? Supposing I've done my sugar reading in the morning, but I didn't log it in. Then sometime in the afternoon, I remember. And I so can I log it in?” (Female, 54-year-old) | Backdating was desired | 2 | Flexibility and Adaptive |
| “I eat something sinful you know. But when I put my comments, I'm very specific, so I know, I know what, what is on but what you have is good but too general.” (Female, 63-year-old) | A comment box was desired | 2 | Flexibility and Adaptive |
| “Especially when I'm insulin if I take too little, I need to titrate lower, lower to titrate lower right. My blood glucose will go hypo. So, readings are very important to me.” (Male, 62-year-old) | Importance of blood glucose reading in titrating insulin dose | 2 | Tracking and Monitoring |
| Food Logging | “As long for the databases, for the food intake, the different type food is localized database I appreciate. Because a lot, a lot of other American apps European apps do not have food, you know food that is localized so very difficult I mean eating spaghetti, macaroni, steak what not uh tortillas, nachos. We do not take that every day and some people do not take at all, so it will not be a very good database la so appreciated to be localized with all the local hawker food which majority of people in Singapore eat hawker food.” (Male, 62-year-old) | Localized food options were appreciated | 1 | Flexibility and Adaptive |
| “But the trouble with those apps, the food is designed by Americans and European, so I cannot find a food calorie or carbo, a value for char kway teow because they don't have char kway teow in the US.” (Male, 69-year-old) | Localized food options were appreciated | 1 | Flexibility and Adaptive |
| “What if I only take char kway teow half dose… I mean half plate.” (Female, 41-year-old) | To be able to input half-portion was desired | 1 | Flexibility and Adaptive |
| “So, I can input as many times a day, like if I have five meals, three meals, I can input five times a day la.” (Female, 40-year-old) | Ability to log in as many times was appreciated | 1 | Flexibility and Adaptive |
| “I think that is all I actually struggle with selecting item and sometimes I scroll through Iost a bit of patient actually. Sometimes the selection of item I had to scroll a lot and sometimes I lost patients doing it la.” (Female, 63-year-old) | Food options were extensive, complicating the selection process | 2 | Simplicity |
| “Before we go and jump into the well, like eat, or whatever we want to be, at least we are made aware, you're more aware whether or not you're eating something that's suitable, something that's healthy. I mean, of course, there will be times that you will, aiya don't bother about the health. But guess what, go for cravings or will go for preference, that is a different story. But it may have an option. And we have a choice, at least we can make a more informed uh choice here.” (Female, 54-year-old) | With a list of healthier food options, it would remind users to make better food choices | 2 | Motivation |
| “If the meal that you provide you showed here, if you have also indicated the amount of glucose this meal if you take will enter your body so we will know that oh I’m not supposed to take this chicken biryani, is too much glucose you know.” (Male, 60-year-old) | By displaying sugar content of foods in the app, it would remind users to make better food choices | 2 | Motivation |
| “I found that new selection is not very comprehensive la, so sometimes I just do the nearest item, especially for local, local dishes because I cook myself. So, I just is not as, I don't find it very comprehensive. I find that the selection Is more like those you buy from mart or zi char stall that kind.” (Female, 63-year-old) | Food options were not comprehensive. She then selected similar options | 2 | Flexibility and Adaptive |
| “You're saying there's a flexibility? To add in manually, I think that's fine. For those that cook that will be a plus point. Because there may be something that we are cooking that's not inside the list then, so manual entry is fine.” (Female, 40-year-old) | Ability to manually input food details was appreciated | 2 | Flexibility and Adaptive |
| “At least I can add up give rough estimate the breakfast meal will have how much carbo cause like I don't care about the rest. The rest must be low in protein, low in fat also la, but the carbs is the one that will affect my blood glucose level. So, I want to know, yeah, just roughly. Am I exceeding the allotted carbo for my metabolism or is it too little or too much? Then you put it mix with a meal, at least I have a rough idea, clear idea of how much carbo am I taking.” (Male, 62-year-old) | Presentation of carbohydrate content of food was appreciated | 2 | Informational Content |
| “And then I think for, for the food intake part. Yeah, it is a little tedious. Quite tedious to find to exactly match what I eat ah. Which, you know, with the selection, sometimes I do approximation or agak-ration or the nearest to it.” (Female, 63-year-old) | Tedious to find the exact food items. She then selected similar options | 3 | Simplicity |
| “Yeah, I think that is good. That's what I mentioned previously, that is good to know, give us a reminder, you know, so that we don't over overtake the food. This is very good la, this app is, is very good. I mean, at least as a reminder for us lor, sometime you know, that we are tempting, you know, the food everybody are eating in front of you. And then, you know, so there's a reminder for us lor.” (Female, 56-year-old) | Feature served as a reminder to control food intake | 3 | Motivation |
| “Then as for the food log, I tried inputting something. Uh it's not completely to what I had, but I just, I just for me, it's like I'll just find something similar. I'm not very particular about taking note of every single thing that I eat. So, for me erm it's okay. I'm not very particular about having exact item log in so it's okay. But for other users who, who are very picky, uh they may, they may have some comments on that.” (Female, 40-year-old) | Could not find the exact food items. She then selected similar options | 3 | Flexibility and Adaptive |
| “And it's also quite good. I'm looking at the crispy fried chicken, one portion, it gives me the calorie and the carbs. And so, it's like, if I feeling very greedy, or it will just also tell me that I may, I should not be eating this la. So, I think that is quite useful.” (Female, 40-year-old) | Content displayed informed her about which foods she should avoid | 3 | Informational Content |
| Medication Logging and Plan | “Ah, one point came to my view, certain medicine, there is a whole tablet, but it can be broken into half and a initial dosage is half a day tablet. So how do I key in default dosage for say A B C drug half a tablet. There is no half.” (Male, 62-year-old) | Ability to input half-dose was desired | 1 | Flexibility and Adaptive |
| “Yeah, I just want to check, is it this time we have to keep in daily? Because it's already repeating. So, to me, because every day we are taking the same doses and the same unit. So should we just uh just got any key for us just taps is, is a retainer follow the previous day?” (Female, 65-year-old) | Ability to record medication by simply tapping on a button instead of typing in the name every time was desired | 1 | Flexibility and Adaptive |
| “So, my understanding some, some of us may have also added on erm certain natural remedies, in addition to the, to the medication taken. So, and that's also on a daily basis on a weekly basis, or something like that. So, do we mention that somewhere? It may not be the medication list, but should that be a mention of it somewhere?” (Female, 54-year-old) | Ability to input complementary health products was desired | 2 | Flexibility and Adaptive |
| “Yeah, maybe, yeah, maybe if you have an option like this to add, like nonprescriptive medication or home remedies, or, you know, some people go on homeopathic, so many different uh.” (Female, 54-year-old) | Ability to input non-prescriptive medications, complementary health products was desired | 2 | Flexibility and Adaptive |
| “Every day I got the same, same thing is no easy recording because you got to search for the item then record you know. Can you do something about a scheduled medication? That is, if I enter once and for all the scheduled medication and then I just kind of press a button and it comes up and then I tick whether I had done them. You know what I mean.” (Female, 63-year-old) | Ability to record medication by simply tapping on a button instead of typing in the name every time was desired | 2 | Flexibility and Adaptive & Simplicity |
| “But diabetes is only a few type, you know, so maybe some of the medication can in the list so that we just click or just add in or just numbering or just click, you know, the type of thing so it's more convenient, easy for us.” (Female, 56-year-old) | Ability to record medication by simply tapping on a button instead of typing in the name every time was appreciated as it was more convenient | 3 | Flexibility and Adaptive & Simplicity |
| “Ok I will do that because, because in my mindset you don't have short cut, so I need to key every single words on it. So, I have five to six medication and then plus the injection. Wow, I thought that wow I need to spend time to type in so I definitely skipped but I will tell myself that I need to key in lor. So, normally I will key my, my blood and my weight and others.” (Female, 56-year-old) | Ability to record medication by simply tapping on a button instead of typing in the name every time was appreciated as it was more convenient | 3 | Flexibility and Adaptive & Simplicity |
| “The other thing the input of medication, I noticed that the only issue is all the medication of diabetes is how about other the, when I input cardiac medication, for instance, it doesn’t show, why is it so I mean, for us people kind of problem we have.” (Male, 69-year-old) | Ability to input other prescriptive medications (besides diabetes medications) was desired | 3 | Flexibility and Adaptive |
| Physical Activity Logging | “That’s why if I need to buy my own tracker to use the app, I may not use the app.” (Female, 63-year-old) | If a fitness tracker is provided, it will encourage her to use the app | 1 | Motivation |
| “Ah, okay. That's why because other than that, I mean. Now what we have is the Apple Watch and stuff like that, right? The Fitbit, the Apple Watch, which you can sync to your phone, and things like that. But whether or not it is compatible to sync to the app is another is another story, right?” (Female, 54-year-old) | Synchronization of data from other fitness trackers (besides Fitbit tracker) was desired | 3 | Flexibility and Adaptive |
| Other concerns on logging | “Yes. Yes. Because eh one week 7 days you cannot everyday also free one, you know, so sometimes just openly, freely, whenever we remember them, or maybe we are free, we just log in lor you understand. So not say that, oh, over already, we cannot add in. So that's why I mean, we can, sometimes maybe busy, or maybe sometime we missed out, so we cannot add in them. Then there's no report already.” (Female, 56-year-old) | To be able to backdate was desired | 2 | Flexibility and Adaptive |
| “Okay, the thing is that, uh supposing all right, like I've done whatever activity I have done for the day, but I've forgotten to log it in. So, can I, like, the next day, log it in for the previous day? Is it can we do that?” (Female, 54-year-old) | To be able to backdate was desired | 2 | Flexibility and Adaptive |
| “Yeah, because I'm only free on Saturdays Sundays. So, Mondays or Fridays is 24 hours like you work it and so it's terrible. So normally, whatever I do my calendars, I do on a Saturday. So can I do on a Saturday where I can Mondays to Friday, whatever I did again and get figured out?” (Male, 60-year-old) | To be able to backdate was desired | 2 | Flexibility and Adaptive |
| “Because I always forget to record on the same day, I would like to record previous days. At first, I got a problem trying to find that the days. Later on, I managed to find it. Yeah, so is it true that you can, I managed to find the particular data yesterday. And do my recording la.” (Female, 63-year-old) | To be able to backdate was desired | 2 | Flexibility and Adaptive |
| Patient Diary | “Because you tend to forget a lot of things. You forget, you forget what time you eat, and you forget what you eat as well.” (Female, 40-year-old) | Liked that she was able to view previous entries | 1 | Tracking and Monitoring |
| “So, for diabetics, right. Certain foods may, may cause our okay, so like they tell you for diabetics, post meal is 10 units, right? Pre meal? Mdm H, is 6 right, between 6 and 10 la so that's the healthy range. Okay. So, let's say on this particular day, I was a bit greedy, I had three prata instead of two. So, after that, it shoots my sugar up to 12 or 13. So that's what we call a spike yeah, then I trace back on my app, I see that okay, this day, I have a certain meal that causes my sugar to increase higher than...” (Female, 40-year-old) | Liked that she was able to view previous entries | 1 | Tracking and Monitoring |
| “It's good for forgetful people. It shows the time that I had my, that I took the medication.” (Female, 40-year-old) | Liked that she was able to view previous entries | 2 | Tracking and Monitoring |
| “Yeah, actually, is good for them, to remind them, and also to see what the medication they take, and how's the help why, even for the patient for my friend or for patient own is also good for the family? If anything happened, they can look at this app, they know that what medication and what is the sugar level? And what kind of things that he or she have do before that kind of things.” (Female, 56-year-old) | Liked that she was able to view previous entries | 3 | Tracking and Monitoring |
| Report | “At different times of the day, trending over a week over month so I can share to my doctor. eh Doctor (name). Look here, it’s doing very good.” (Male, 62-year-old) | Would like to share his trends with his doctor | 1 | Data Sharing |
| “If the readings can be exported, that is good. Because when I go for my appointment, I don't have to fill in the paper. Okay, I will forget about it. So, I export the data, I pass it to my, to my doctor, then to the to my nutritionist as well.” (Female, 40-year-old) | Export function was appreciated | 1 | Data Sharing |
| “The app show that today the trending. 3 4 times I took the blood glucose, I see the trending for the day then I review it over the weeks. I can see it. I don't think for people on oral medication is important for them, but people who like me on insulin, we need to know, right. Also, we need to know how good eyeball are the food that we take or spikes. We do not want spikes. We want to be a very, very gradual up, and also a gradual down, as like a, like normal nondiabetic patient.” (Male, 62-year-old) | To be able to view the trend of blood glucose levels was appreciated | 1 | Tracking and Monitoring |
| “I think so it is a very good app. I’m going to it I like it, because you have a graph to tells you when you're going to, when you didn't take your medicine, activities important, medicine and food.” (Male, 60-year-old) | Ability to view the trends of past activities was appreciated | 1 | Tracking and Monitoring |
| “Because you don't know when and which day you know, your collapse. So, I find that this is to give you a sign. You know, to help you to maintain you know, and then you know to control your diet, some of the food really cannot eat. You know when, when you see the sugar pop up, you really worry, you know, you don't know when and where you will fainted. So, I find that this, this is very good. I mean make yourself a standardized maybe one month maybe, you know beginning month, and center month, and end of the month maybe you know four weeks. Maybe I every, every week and then or maybe then you know that whether your, your, your, your glucose is there or not. So don't wait until when you consult the doctor then you do the glucose is, is very, dangerous, you know.” (Female, 56-year-old) | To be able to monitor blood glucose levels was appreciated | 2 | Tracking and Monitoring |
| “Yeah, I mean I review those for blood glucose, food, and medicine everything la. This is the trending over certain uh period, you know. Weekly, monthly I think is best of other apps that I have used. Give you a trending over a certain period, are you progressively good or progressively getting worse, or you know. So, the trending is very good.” (Male, 62-year-old) | Ability to view the trend of blood glucose levels, medication adherence and food intake was appreciated | 2 | Tracking and Monitoring |
| “I wasn't aware about the export thing. Yeah, but I think it's good especially those who are pregnant ladies who need to export this to doctors. Ya, this was a feedback that I gave. This was good thank you.” (Female, 40-year-old) | Export function was appreciated | 3 | Data Sharing |
| “I think it will be it will be good for our own record, maybe even to show the doctors when we go for our appointments or something like that if need be. I think it is a good, it is a good option to have.” (Female, 54-year-old) | Export function was appreciated | 3 | Data Sharing |
| “This is important. I mean, I think I think it’s a useful tool again, because then it tells us how good or how bad we have been in a way.” (Female, 54-year-old) | Liked that the feature allowed her to monitor her health | 3 | Tracking and Monitoring |
| Goal Setting | “Yeah, no, I mean, you see, when you set targets, or when you set goals, you want to try and achieve them la, you know, but maybe I was a bit too... what I would, too ambitious about it. But so, I became a bit put off when it didn't reach that extent but think got to be a bit more realistic and go slow.” (Female, 54-year-old) | Demotivated when goals not met | 3 | Motivation |
| “Actually, is helping us is helping us to remind us and also to keep us keep track of us you know, how well we are doing.” (Female, 56-year-old) | Feature reminded users to keep track of goals | 3 | Motivation |
| “I think for me the food tab is very useful, because that helps us to actually keep track of those on the app to help us keep track of our goal to achieve the lower blood sugar then that would be, that should be problem in everybody's mind, who's going to use this app.” (Male, 69-year-old) | Feature to keep track of goals was appreciated | 3 | Tracking and Monitoring |
| Notifications | “Of course, some apps will set a reminder for you to take the medicine right, take your blood glucose reading half an hour prior to your meals. Means this kind of notification in app is very important, which l now using my alarm to do it la.” (Male, 62-year-old) | Notification to remind user to take medication was desired | 1 | Motivation |
| “The reminder to take a medicine on time, that is, that is actually what I’m doing it on my handphone right now. That is a very, very good reminder, right I think, especially for older people with the management problems, you know, you can forget to take your medication.” (Female, 63-year-old) | Notification to remind user to take medication was desired | 1 | Motivation |
| “Yeah, basically what I was saying is that you know, you have an app they have must be connected with the main server and hospital whereby where if the sugar reading goes to about let's say 15 or 16 or something like that 20 ah it automatically triggers alert on the main server to the doctor as well as to, to the person who is doing this you know, the diabetics so at least they know that they have to run to hospital get something done.” (Male, 60-year-old) | Notification to alert doctor was desired | 1 | Data Sharing |
| “For the caregiver, the alert comes in they will basically rush the parents to the hospital. So that saves, saves people you know.” (Male, 60-year-old) | Notification to alert caregiver was desired | 1 | Data Sharing |
| “And then I also noticed that there are notifications like no medication input has been recorded for several days cause there were days I didn’t put in. So, there's a notification that will prompt me to say that you didn't record your medication for that day.” (Female, 40-year-old) | Reminder to complete medication logging was appreciated | 3 | Motivation |
| Appointment Management | “The appointment I would say itself is a, actually, a duplication of what I can get through HealthHub actually la. So, if all can go into one particular app instead of going into so many app, that should be helpful la.” (Male, 69-year-old) | Too many health apps with the same function | 1 | Simplicity |
| Gamification | “The incentive is to manage our chronic disease, not to exercise more, get into train, get reward of bubble tea or boba tea or whatever.” (Male, 62-year-old) | Uninterested in game center, not his purpose of using the app | 1 | Motivation |
| “Uh It's more like I, I, I know that I have done well. I, I achieve good reading and then I get a reward. I think that would be made me feel more, uh, how what was that word say? What’s that word? More motivated and more driven.” (Female, 41-year-old) | Uninterested in game center as it was not very motivating | 1 | Motivation |
| “You see you know why yeah, since you are paying so much medication. So, if, if you want us to if you want to encourage us to use this app, doing something that in relation to you know so that we can reduce cost.” (Female, 54-year-old) | Discount on medical bills as a reward can encourage use of the app | 2 | Motivation |
| “It really depends on what is the price if it's small little voucher I’m not very keen.” (Female, 63-year-old) | Uninterested in small monetary rewards | 3 | Motivation |
| “I'm not also a gamer. I don't enjoy playing games and basically no interest in games over the on the phone and stuff like that. So, I also didn't find that very useful. However, hearing what you have said like if for instance, it's exchanged for vouchers or something like that, something more beneficial or useful I think then then yes, then probably it would make sense.” (Female, 54-year-old) | Uninterested in game center but interested in vouchers | 3 | Motivation |
| “I think in terms of the design of the games, I think it would be good if we can design such a way to, to in to as a challenge to, to increase our knowledge about diabetic control.” (Female, 63-year-old) | Educational games were desired to increase knowledge of diabetes | 3 | Motivation & Informational Content |
| “Yeah, I mean, you see, because if you want to encourage people to come to your game center, you got to make it, you got to give them options. Number one, you got to make it interesting. And then you know something that can relate to people as well. Like, everything is so straightforward, it becomes mundane, it becomes boring. So, if you want them to challenge you want it to be challenging and interesting. I guess you got to put just put in a bit more choices.” (Female, 54-year-old) | More options of games were desired to encourage users to play the game | 3 | Motivation |
| Educational Materials | “Uh articles like this is no use to me because I already have trialed the Internet to many, many accredited diabatic centers and read a lot articles. That is more when enlightening than articles that we have but is good but newly diagnosed diabetics.” (Male, 62-year-old) | Already well informed of condition, uninterested in educational materials | 1 | Informational Content |
| “If I mean, I think for new users will be good, or those who are newly diagnosed and using start using this app. Uh, for me, I have been a condition for twenty years so the resources may, may, may be something I already known.” (Female, 41-year-old) | Already well informed of condition | 1 | Informational Content |
| “I've just gone through it. But from what I see, I think it's it should be useful. I mean, at least information, its information is useful. And uh rather than reading all sorts of fake news, this is real news so is more...” (Female, 54-year-old) | Articles seemed useful | 2 | Informational Content |
| “Uh resources and actually so I mean I like do some useful reading over the Internet.  Put everything in one place like yeah, yeah but more or less are, I know the stuff already.” (Female, 63-year-old) | Already well informed of condition | 2 | Informational Content |
| “Okay, I'm just wondering about this because I actually heard from an ex-colleague of mine for those who are on insulin jabs you needles very often right? So previously for me I purchase from JB because it’s cheaper, now we can't do that already. So, like I'm not sure if there’s say like a certain place in Singapore where I can buy my needles cheap somewhere. So, this kind of information I'm not sure it's helpful for the users.” (Female, 40-year-old) | Information on places to purchase affordable insulin needles was desired | 3 | Informational Content |
| “Input so far is quite okay I was thinking maybe what do you call medication information, say what are the best time to take before after that kind of thing, what it does to the body you know that's sort of thing plus the insulin those people that take insulin, proper way to take insulin, you actually prick prepared yourself before you pick the needle, which part prick because needle pricking is very painful if you have to do it daily. It's a bit of a problem for most people.” (Male, 69-year-old) | Information on diabetes medications and proper way to inject insulin was desired | 3 | Informational Content |
| “So, with some maybe as I said on the resources part, you know, maybe it could be some encouraging kind of talk or so to step up this people to carry on.” (Male, 69-year-old) | Encouraging information was desired | 3 | Informational Content |
| “For me, I would, I would be looking out for ways and means to manage control over diabetes, and something positive and uplifting. Like, I wouldn't want to read sad stories or sob stories.” (Female, 54-year-old) | Positive information was desired | 3 | Informational Content |
| “Like, I mean, what I see here is pretty good, like top foods to avoid, best foods, traveling with diabetes. And all I think, I think it's pretty good. It's good enough. You know, articles like that. I think that will be to me that is this useful, something that's useful that we can read, and we can apply. (Female, 54-year-old) | Articles seemed useful | 3 | Informational Content |
| “Yeah, because I understand that diabetic oral medication uh, there's a lot of new drugs. And I don't know a lot but there are new drugs in develop. So sometimes the doctors say okay, you change to this medication and the doctor doesn't really say much because they have no time, no time. So, it's good that you can clearly more, more details, what are the pros, what are the side effects.” (Female, 63-year-old) | Information on new diabetes medications was desired | 3 | Informational Content |
| “One feature, maybe one feature maybe if you can highlight to us where we can get diabetic friendly food at a reasonable cost. And like what is available where it's available because honestly, I am going to mention the place. I was at CGH about two weeks ago, getting medication for my husband and then there's a pharmacy there. And they're they had sugar free products, but it was exorbitantly priced.” (Female, 54-year-old) | Information on places to purchase affordable diabetic-friendly foods was desired | 3 | Informational Content |
| “I think the ones here are pretty good already like the top foods and then best foods and then how to exercise safely. So, I was looking again just now and it's, it's informative it's good. So, I think this is a good start already.” (Female, 40-year-old) | Materials seemed informative | 3 | Informational Content |
| Chat | “What if we can chat with someone who is a fellow patient. I think fellow patient on health, you know, with the doctor because doctors are so busy. It could be someone in diabetics center, because it may not be medicine not be medical related it could be like psychological, psychological related questions that you can reach out to a fellow patient to as well. Okay, so it's more like a so called a platform for you to talk to other patients also la.” (Female, 40-year-old) | Chatting platform consisting of patients with diabetes was desired for emotional support | 1 | Motivation |
| “So, if the chat is managed by a doctor, a, a diabetic endocrinologist, then is good. If it’s your personal doctor treating your diabetes that will be better. So, I do not know the chat is, is, who, who is the person behind the chat.” (Male, 62-year-old) | Preferred personal doctor to be chatting with him | 1 | Data Sharing |
| “So, if it’s with another doctor, uh I mean, doctors have different views sometime. Two different doctors might have two different views of the same subjects, which are...” (Male, 69-year-old) | Preferred personal doctor chatting with him | 1 | Data Sharing |
| “Uh yes, it will be much easier rather than I, I send email.” (Female, 41-year-old) | Chat function appeared convenient | 1 | Data Sharing |
| “But I like, I don’t know whether, I don't know about whether the hospital or the polyclinic can you know, provide the, give you that kind of communication.” (Female, 63-year-old) | Chat function was viewed with skepticism | 1 | Data Sharing |
| “It could be very useful, especially if you're traveling and you need to consult with your health caregiver. Yeah, I think it would be useful. Yes.” (Female, 54-year-old) | Chat function appeared useful | 2 | Data Sharing |
| General Concerns and Feedback | “But the thing that I felt that it requires a lot of data input? And erm I'm just thinking like things like that the stats, the minutes, the calories burned, things like calories burned.” (Female, 63-year-old) | Too much data to be inputted | 1 | Simplicity |
| “Actually, the apps I don't know how to start. Then after that for testing, I try one that I know this situation, I mean for the other one, I know how to manage to, to go in already at first, I don't know what record the day and time. I don't know where to touch.” (Female, 65-year-old) | Unsure how to use the app | 1 | Competency |
| “Because we are not, because we are not in the 20s 30s a savvy uh iPhone guy you know. We are in the 60s, you know, so for me to do an app uh, I need somebody to guide me before I even get into an app but once you guide me if I get the hang of it I okay already.” (Male, 60-year-old) | Guided training of was required | 1 | Competency |
| “But if you have people who are young, they, they are quite good in this. And just but normally diabetics, and you have a lot of older people, and they will have difficulties understanding, maneuvering around this.” (Male, 60-year-old) | Older generation would have difficulty using the app | 1 | Competency |
| “You can build the best secure system. Somebody out there will crack for you. Nothing is safe in the Internet.” (Male, 62-year-old) | Concerned about data privacy | 1 | Data Sharing |
| “But I think no harm as well as long as not able to see the IC and the personal data info, I think it's fine.” (Female, 41-year-old) | Concerned about breaches of personal data | 1 | Data Sharing |
| “Uh is like maybe I want to see like for the past two years how have been my HbA1c uh improve or, or whether I should work on it. So, it's like a I mean, I can check from the HealthHub. But if could incorporate into this app that I can know my past HbA1c result, I think that will be nice.” (Female, 41-year-old) | Wanted HbA1c test results to be incorporated | 1 | Tracking and Monitoring |
| “I think there are some patient they also regularly check your cholesterol level I think it'd be nice to, to have a feature where at one glance, I can uh see my cholesterol.” (Female, 41-year-old) | Wanted lipid panel test results to be incorporated | 1 | Tracking and Monitoring |
| “We have the family history for the diabetics. So, for us most of our family members, because during our age will have this problem so have this app to let them to monitor their blood sugar.” (Female, 65-year-old) | Would recommend app to family members for them to monitor blood glucose levels | 1 | Tracking and Monitoring |
| “Yeah, but another thing is because normally diabetes is on the age one but a few of them are young la, but try to don't, don't do it so complicated. You know like this morning like that I also don't know how to do so try to as easy as possible for those elderly? You know, because we not professional IT. So sometimes, you know, we don't even touch computers or whatever. Okay, just to try as more easier as possible to them.” (Female, 56-year-old) | Older generation would have difficulty using the app | 2 | Competency |
| “My goals. I haven't set. I, I don't know how to how to set it also.” (Male, 62-year-old) | Did not know how to use a feature | 2 | Competency |
| “I would even recommend it to those who are even not diabetics so that they are made more aware because seeing on the rise in this country. So, it doesn't mean that if you're a non-diabetic you don't check your sugar and stuff like that so I would even recommend it to like, like, like Health Buddy, anybody can download the Health Buddy app right? So, I would recommend it to all just as a personal diary as a to monitor your own health.” (Female, 54-year-old) | Would recommend app to everyone including non-diabetics for them to monitor their health | 2 | Tracking and Monitoring |
| “Because this, this is why I didn't know that short cut so because I find like, oh medication I need to key in a lot of words, so I, I dropped this and then I, I didn't do that. Maybe free time I really try to go.” (Female, 56-year-old) | Did not know how to use a feature | 3 | Competency |
| “Ya I think it's good for people who are pre diabetic, not even blown diabetic yet. Because like you don't have to wait until you are diagnosed like I have some friends who are monitoring their sugar levels. So, it's good to just use it to monitor the sugar level and like can control it through exercise and through their food intake as well.” (Female, 40-year-old) | Would recommend app to non-diabetics and people with prediabetes for them to monitor their blood glucose levels | 3 | Tracking and Monitoring |
